# Supplementary material for: miR-199b, a novel tumor suppressor miRNA in acute myeloid leukemia with prognostic implications
Source: Springer Nature journal article supplement (doi:10.1186/s40164-016-0033-6), 2015-12-01
Supplement: MOESM2 [file 9788638]

# Supplemental Table S1

## Clinical and Molecular Characteristics with FAB M5 Subtype

| TCGA ID#     | Age at Diagnosis | Vital Status | Cytogenetic Abnormality           | FLT3 | IDH1 R132 | IDH1 R140 | IDH1 R172 | Activating |      |
|--------------|------------------|--------------|-----------------------------------|------|-----------|-----------|-----------|------------|------|
|              |                  |              |                                   |      |           |           |           | RAS        | NPMc |
| TCGA-AB-2824 | 45               | DECEASED     | Normal                            | -    | -         | -         | -         | -          | +    |
| TCGA-AB-2825 | 31               | DECEASED     | Normal                            | +    | -         | -         | -         | -          | +    |
| TCGA-AB-2832 | 60               | DECEASED     | Normal                            | -    | -         | -         | -         | -          | -    |
| TCGA-AB-2835 | 48               | LIVING       | Normal                            | -    | -         | -         | -         | -          | +    |
| TCGA-AB-2837 | 66               | DECEASED     | Normal                            | -    | -         | -         | -         | -          | +    |
| TCGA-AB-2851 | 66               | DECEASED     | Normal                            | +    | -         | -         | -         | -          | -    |
| TCGA-AB-2861 | 76               | DECEASED     | Normal, Trisomy 8                 | -    | -         | -         | -         | -          | +    |
| TCGA-AB-2873 | 51               | LIVING       | Normal                            | -    | -         | -         | -         | -          | -    |
| TCGA-AB-2883 | 60               | LIVING       | Normal, Trisomy 8                 | -    | -         | -         | -         | -          | -    |
| TCGA-AB-2893 | 45               | DECEASED     | N/A                               | -    | -         | -         | -         | +          | -    |
| TCGA-AB-2894 | 50               | DECEASED     | Normal, del (7q) / 7q-   t (9;11) | -    | -         | -         | -         | -          | -    |
| TCGA-AB-2910 | 61               | DECEASED     | Normal                            | +    | -         | -         | -         | -          | -    |
| TCGA-AB-2925 | 57               | DECEASED     | Normal                            | +    | -         | -         | -         | -          | +    |
| TCGA-AB-2932 | 62               | LIVING       | Normal                            | -    | N/A       | -         | -         | -          | +    |
| TCGA-AB-2956 | 61               | DECEASED     | Normal, t (9;11)                  | -    | -         | -         | -         | -          | -    |
| TCGA-AB-2969 | 55               | LIVING       | Normal                            | +    | +         | -         | -         | -          | +    |
| TCGA-AB-2981 | 35               | LIVING       | Normal                            | +    | +         | -         | -         | -          | +    |
| TCGA-AB-2985 | 81               | DECEASED     | Normal                            | -    | -         | -         | -         | +          | -    |
| TCGA-AB-2987 | 75               | DECEASED     | Normal, del (7q) / 7q-            | -    | -         | -         | -         | +          | +    |
| TCGA-AB-3005 | 45               | LIVING       | Normal                            | N/A  | -         | -         | -         | -          | -    |
