# Supplementary material for: miR-199b, a novel tumor suppressor miRNA in acute myeloid leukemia with prognostic implications
Source: Springer Nature journal article supplement (doi:10.1186/s40164-016-0033-6), 2015-12-01
Supplement: MOESM3 [file 9788638]

**Supplementary Table S2**

|   | <b>p-value</b> | <b>Gene</b>  | <b>Entrez Gene Name</b>                                           | <b>Location</b> | <b>Type(s)</b>             |
|---|----------------|--------------|-------------------------------------------------------------------|-----------------|----------------------------|
|   | 1.10E-11       | C22orf26     | chromosome 22 open reading frame 26                               | unknown         | other                      |
|   | 2.37E-11       | HOXA3        | homeobox A3                                                       | Nucleus         | transcription regulator    |
|   | 4.36E-11       | CPNE8        | copine VIII                                                       | unknown         | other                      |
|   | 1.30E-10       | HOXA6        | homeobox A6                                                       | Nucleus         | transcription regulator    |
|   | 2.31E-10       | HOXB3        | homeobox B3                                                       | Nucleus         | transcription regulator    |
|   | 4.67E-10       | LOC100271722 | uncharacterized LOC100271722                                      | unknown         | other                      |
| → | 5.11E-10       | HOXB6        | homeobox B6                                                       | Nucleus         | transcription regulator    |
|   | 8.84E-10       | SARM1        | sterile alpha and TIR motif containing 1                          | Plasma Membrane | transmembrane receptor     |
|   | 9.67E-10       | HOXA4        | homeobox A4                                                       | Nucleus         | transcription regulator    |
|   | 1.29E-09       | SLC46A1      | solute carrier family 46 (folate transporter), member 1           | Plasma Membrane | transporter                |
|   | 1.57E-09       | RIPK3        | receptor-interacting serine-threonine kinase 3                    | Plasma Membrane | kinase                     |
| → | 1.85E-09       | HOXA7        | homeobox A7                                                       | Nucleus         | transcription regulator    |
|   | 2.70E-09       | HOXA5        | homeobox A5                                                       | Nucleus         | transcription regulator    |
|   | 4.36E-09       | HOXA9        | homeobox A9                                                       | Nucleus         | transcription regulator    |
|   | 4.94E-09       | TMCO4        | transmembrane and coiled-coil domains 4                           | unknown         | other                      |
|   | 6.81E-09       | HOXB4        | homeobox B4                                                       | Nucleus         | transcription regulator    |
|   | 7.16E-09       | HOXB5        | homeobox B5                                                       | Nucleus         | transcription regulator    |
|   | 1.04E-08       | HOXA10       | homeobox A10                                                      | Nucleus         | transcription regulator    |
|   | 1.05E-08       | RMND5B       | required for meiotic nuclear division 5 homolog B (S. cerevisiae) | unknown         | other                      |
|   | 1.58E-08       | WDR91        | WD repeat domain 91                                               | unknown         | other                      |
|   | 1.59E-08       | HOXB2        | homeobox B2                                                       | Nucleus         | transcription regulator    |
|   | 1.63E-08       | TCTA         | T-cell leukemia translocation altered                             | unknown         | other                      |
|   | 1.74E-08       | ACBD4        | acyl-CoA binding domain containing 4                              | unknown         | other                      |
|   | 3.40E-08       | IQCE         | IQ motif containing E                                             | Cytoplasm       | other                      |
|   | 4.58E-08       | TTYH3        | tweety homolog 3 (Drosophila)                                     | Plasma Membrane | ion channel                |
|   | 8.05E-08       | AIFM2        | apoptosis-inducing factor, mitochondrion-associated, 2            | Cytoplasm       | enzyme                     |
|   | 9.70E-08       | PARP3        | poly (ADP-ribose) polymerase family, member 3                     | Nucleus         | enzyme                     |
|   | 9.95E-08       | MVP          | major vault protein                                               | Nucleus         | other                      |
|   | 1.20E-07       | DUSP28       | dual specificity phosphatase 28                                   | unknown         | enzyme                     |
|   | 1.25E-07       | LTB4R        | leukotriene B4 receptor                                           | Plasma Membrane | G-protein coupled receptor |
|   | 1.38E-07       | FNBP1        | formin binding protein 1                                          | Nucleus         | enzyme                     |
|   | 1.41E-07       | AGXT2L2      | alanine-glyoxylate aminotransferase 2-like 2                      | Cytoplasm       | enzyme                     |
|   | 1.41E-07       | STK10        | serine/threonine kinase 10                                        | Cytoplasm       | kinase                     |
|   | 1.47E-07       | MEIS1        | Meis homeobox 1                                                   | Nucleus         | transcription regulator    |
|   | 1.66E-07       | CDK18        | cyclin-dependent kinase 18                                        | Cytoplasm       | kinase                     |
|   | 1.72E-07       | STK32C       | serine/threonine kinase 32C                                       | unknown         | kinase                     |
|   | 2.08E-07       | HOXA2        | homeobox A2                                                       | Nucleus         | transcription regulator    |
|   | 2.32E-07       | CLIP4        | CAP-GLY domain containing linker protein family, member 4         | unknown         | other                      |
|   | 2.33E-07       | CCDC97       | coiled-coil domain containing 97                                  | unknown         | other                      |
